# Supplementary material for: Third-Line Palliative Systemic Therapy for Advanced Biliary Tract Cancer: Multicentre Review of Patterns of Care and Outcomes
Source: MDPI journal article supplement (doi:10.3390/cancers15113047), 2023-06-03
Supplement: s1 [file s1]

**Supplementary Materials:**

**Table S1.** Year of receipt of first-line palliative systemic therapy.

| <i>Year 1st-Line Palliative Systemic Therapy Received</i> | <i>Number of Patients</i> |
|-----------------------------------------------------------|---------------------------|
| 2006                                                      | 2                         |
| 2007                                                      | 3                         |
| 2008                                                      | 2                         |
| 2009                                                      | 4                         |
| 2010                                                      | 5                         |
| 2011                                                      | 5                         |
| 2012                                                      | 3                         |
| 2013                                                      | 10                        |
| 2014                                                      | 10                        |
| 2015                                                      | 8                         |
| 2016                                                      | 9                         |
| 2017                                                      | 6                         |
| 2018                                                      | 12                        |
| 2019                                                      | 7                         |
| 2020                                                      | 7                         |
| 2021                                                      | 1                         |

**Table S2.** Fourth-line palliative systemic therapy received by patients with advanced biliary tract cancer and progression through third-line palliative systemic therapy documented prior to death.

|                       | <i>Number of Patients (n = 66)</i> |
|-----------------------|------------------------------------|
| 5-FU/platinum         | 5 (7.6%)                           |
| 5-FU/irinotecan       | 6 (9.1%)                           |
| Gem/platinum          | 4 (6.1%)                           |
| Gem                   | 3 (4.5%)                           |
| RXC004 plus Nivolumab | 1 (1.5%)                           |

5-FU = 5-fluorouracil. Gem = gemcitabine.

**Table S3.** First- and second-line palliative systemic therapy received by patients with advanced biliary tract cancer defined as 'other' in Table 1.

|                                 | <i>Number of Patients</i> |
|---------------------------------|---------------------------|
| <b>First-line therapy</b>       |                           |
| Gem                             | 2                         |
| Cis/Gem plus durvalumab/placebo | 2                         |
| Cis/Gem plus cediranib          | 1                         |
| EOX                             | 1                         |
| 5-FU/irinotecan                 | 1                         |
| <b>Second-line therapy</b>      |                           |
| Capecitabine                    | 6                         |
| Gem/capecitabine                | 5                         |
| 5-FU                            | 2                         |
| Gem                             | 1                         |
| Durvalumab plus tremelimumab    | 1                         |
| Regorafenib plus avelumab       | 1                         |
| Capecitabine/platinum           | 1                         |

Gem = gemcitabine. 5-FU = 5-fluorouracil. EOX = epirubicin, oxaliplatin, capecitabine.
